# Supplementary material for: Larval diet affects mosquito development and permissiveness to Plasmodium infection
Source: PubMed Central journal article supplement (PMC5133635; doi:10.1038/srep38230), 2016-12-02
Supplement: srep38230-s1.pdf [file srep38230-s1.pdf]

## Larval diet affects mosquito development and permissiveness to *Plasmodium* infection – Supplementary information

Inbar Linenberg, George K. Christophides and Mathilde Gendrin

### Supplementary figures

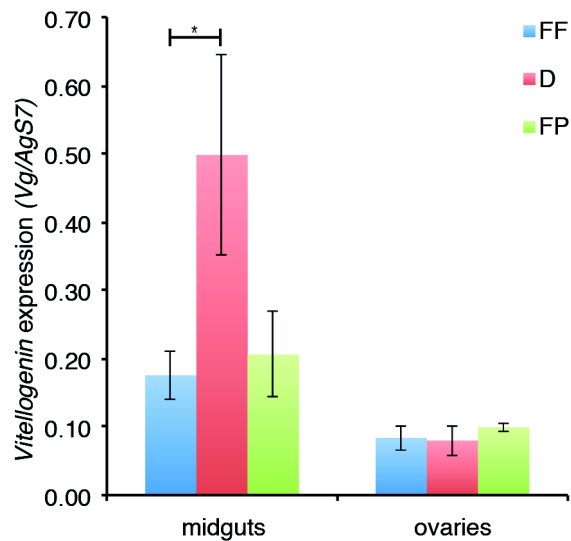

**Supplementary figure S1. Impact of larval diet on *Vitellogenin* expression after blood meal.** qRT-PCR analysis of *Vitellogenin* expression in the midguts and ovaries of female mosquitoes 24 h after a bloodmeal. Transcript quantifications are normalised to *AgS7*. Data show averages ( $\pm$ s.e.m.) from 3 independent replicates and statistical analyses are ANOVA following lmer model fitting, \* -  $p < 0.05$ .

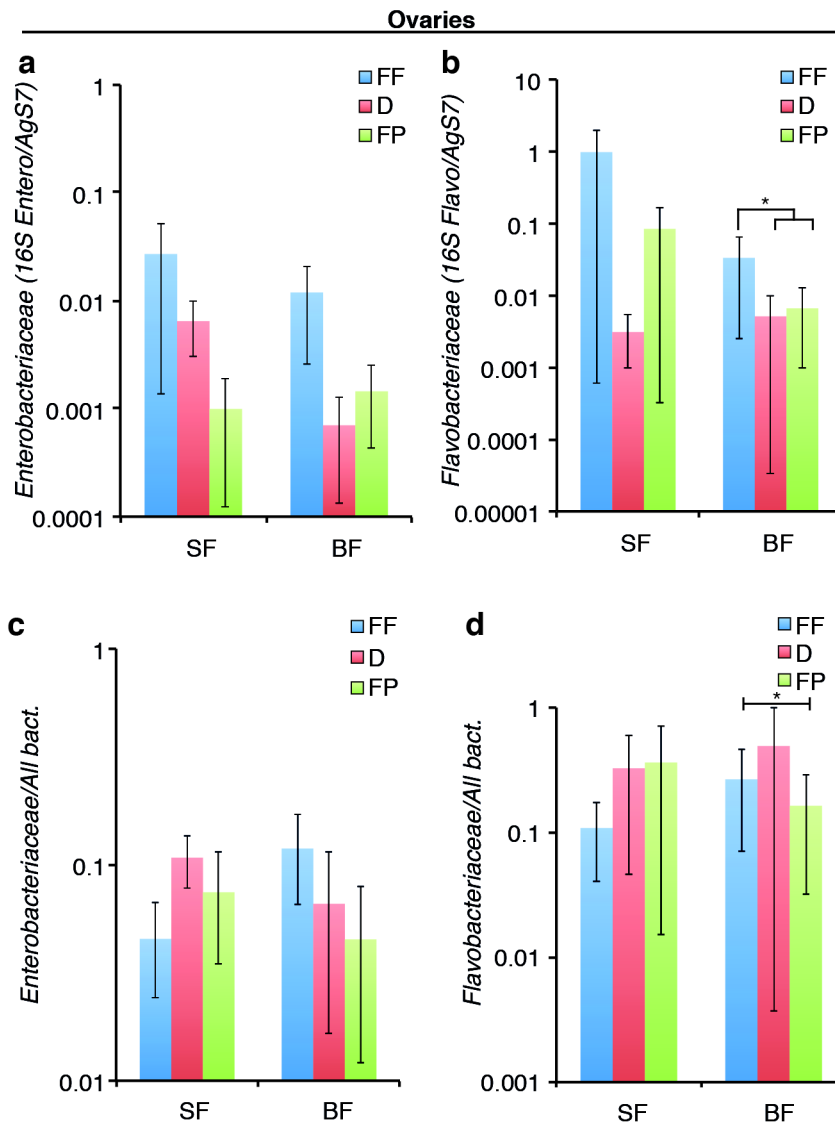

**Supplementary figure S2. Impact of larval diet on the composition of the ovary microbiota.** Family-specific bacterial load in adult ovaries normalised to *AgS7* (**a-b**) and to the total bacterial load (**c-d**), quantified by qRT-PCR on family specific *16S rRNA* amplicons. Data show averages ( $\pm$ s.e.m.) from 3 independent replicates and statistical analyses are ANOVA following lmer model fitting, \* -  $p < 0.05$ .

### Supplementary table

| Gene                                 | Sequence F                    | Sequence R                    |
|--------------------------------------|-------------------------------|-------------------------------|
| S7                                   | GTGCGCGAGTTGGAGAAGA           | ATCGGTTTGGGCAGAATGC           |
| 16S                                  | TCCTACGGGAGGCAGCAGT           | GGACTACCAGGGTATCTAATCCTGTT    |
| 16S, <i>Enterobacteriaceae</i>       | CGTGCTACAATGGCATATACAAAGAGAAG | AGCATTCTGATCTACGATTACTAGCGATT |
| 16S, <i>Flavobacteriaceae</i>        | TAAGGTTGAAGTGGCTGGAATAA       | GTCCATCAGCGTCAGTTAAGACT       |
| 16S, <i>Acetobacteraceae</i>         | GTGCCGATCTCTAAAAGCCGTCTCA     | TTCGCTCACCGGCTTCGGGT          |
| <i>Vitellogenin</i>                  | CTGGTCTATCCGTTTCGCCTC         | GACGTCGCTGTTGCGAATAC          |
| <i>GAPDH - Spodoptera frugiperda</i> | CGGTGTCTTCACAACCACAG          | GAGAGGAGCGAGACAGTTGG          |

**Table S1** – Primer sequences used in qRT-PCR analysis of bacterial microbiota.
